# Supplementary material for: Co-Circulation of Different Hepatitis E Virus Genotype 3 Subtypes in Pigs and Wild Boar in North-East Germany, 2019
Source: MDPI journal article supplement (doi:10.3390/pathogens11070773), 2022-07-06
Supplement: s1 [file s1]

**Table S1.** Summary of the data for all sampled domestic pig and wild boar.

| numbering  | date of collection | species   | liver | feces | muscle |
|------------|--------------------|-----------|-------|-------|--------|
| MWP2019-1  | 02.01.2019         | pig       | X     |       | X      |
| MWP2019-2  | 02.01.2019         | pig       | X     |       | X      |
| MWP2019-3  | 07.01.2019         | pig       | X     |       | X      |
| MWP2019-4  | 07.01.2019         | pig       | X     |       | X      |
| MWP2019-5  | 07.01.2019         | pig       | X     |       | X      |
| MWP2019-6  | 08.01.2019         | pig       | X     |       | X      |
| MWP2019-7  | 09.01.2019         | pig       | X     |       | X      |
| MWP2019-8  | 09.01.2019         | pig       | X     |       | X      |
| MWP2019-9  | 11.01.2019         | wild boar | X     |       | X      |
| MWP2019-10 | 14.01.2019         | pig       | X     |       | X      |
| MWP2019-11 | 14.01.2019         | pig       | X     |       | X      |
| MWP2019-12 | 14.01.2019         | pig       | X     |       | X      |
| MWP2019-13 | 15.01.2019         | pig       | X     |       | X      |
| MWP2019-14 | 15.01.2019         | pig       | X     |       | X      |
| MWP2019-15 | 17.01.2019         | pig       | X     |       | X      |
| MWP2019-16 | 17.01.2019         | pig       | X     |       | X      |
| MWP2019-17 | 17.01.2019         | pig       | X     |       | X      |
| MWP2019-18 | 22.01.2019         | pig       | X     |       | X      |
| MWP2019-19 | 22.01.2019         | pig       | X     |       | X      |
| MWP2019-20 | 22.01.2019         | wild boar | X     |       | X      |
| MWP2019-21 | 22.01.2019         | wild boar | X     |       | X      |
| MWP2019-22 | 24.01.2019         | wild boar | X     |       | X      |
| MWP2019-23 | 30.01.2019         | pig       | X     |       | X      |
| MWP2019-24 | 30.01.2019         | pig       | X     |       | X      |
| MWP2019-25 | 31.01.2019         | pig       | X     |       | X      |
| MWP2019-26 | 05.02.2019         | pig       | X     |       | X      |
| MWP2019-27 | 06.02.2019         | pig       | X     |       | X      |
| MWP2019-28 | 07.02.2019         | pig       | X     |       | X      |
| MWP2019-29 | 08.02.2019         | pig       | X     |       | X      |
| MWP2019-30 | 08.02.2019         | pig       | X     |       | X      |
| MWP2019-31 | 12.02.2019         | pig       | X     |       | X      |
| MWP2019-32 | 12.02.2019         | pig       | X     |       | X      |
| MWP2019-33 | 12.02.2019         | pig       | X     |       | X      |
| MWP2019-34 | 12.02.2019         | pig       | X     |       | X      |
| MWP2019-35 | 12.02.2019         | pig       | X     |       | X      |
| MWP2019-36 | 18.02.2019         | pig       | X     |       | X      |
| MWP2019-37 | 18.02.2019         | pig       | X     |       | X      |
| MWP2019-38 | 19.02.2019         | pig       | X     |       | X      |
| MWP2019-39 | 19.02.2019         | pig       | X     |       | X      |
| MWP2019-40 | 20.02.2019         | pig       | X     |       | X      |
| MWP2019-41 | 22.02.2019         | pig       | X     |       | X      |
| MWP2019-42 | 25.02.2019         | wild boar | X     |       | X      |
| MWP2019-43 | 27.02.2019         | pig       | X     |       | X      |
| MWP2019-44 | 28.02.2019         | pig       | X     |       | X      |
| MWP2019-45 | 27.02.2019         | pig       | X     |       | X      |
| MWP2019-46 | 27.02.2019         | pig       | X     |       | X      |
| MWP2019-47 | 27.02.2019         | pig       | X     |       | X      |
| MWP2019-48 | 28.02.2019         | pig       | X     |       | X      |
| MWP2019-49 | 01.03.2019         | pig       | X     |       | X      |
| MWP2019-50 | 01.03.2019         | pig       | X     |       | X      |
| MWP2019-51 | 01.03.2019         | pig       | X     |       | X      |

|             |            |           |   |  |   |
|-------------|------------|-----------|---|--|---|
| MWP2019-52  | 04.03.2019 | pig       | X |  | X |
| MWP2019-53  | 05.03.2019 | pig       | X |  | X |
| MWP2019-54  | 05.03.2019 | pig       | X |  | X |
| MWP2019-55  | 06.03.2019 | pig       | X |  | X |
| MWP2019-56  | 06.03.2019 | pig       | X |  | X |
| MWP2019-57  | 06.03.2019 | pig       | X |  | X |
| MWP2019-58  | 06.03.2019 | pig       | X |  | X |
| MWP2019-59  | 06.03.2019 | pig       | X |  | X |
| MWP2019-60  | 07.03.2019 | wild boar | X |  | X |
| MWP2019-61  | 08.03.2019 | pig       | X |  | X |
| MWP2019-62  | 08.03.2019 | pig       | X |  | X |
| MWP2019-63  | 12.03.2019 | wild boar | X |  | X |
| MWP2019-64  | 12.03.2019 | pig       | X |  | X |
| MWP2019-65  | 12.03.2019 | pig       | X |  | X |
| MWP2019-66  | 21.03.2019 | pig       | X |  | X |
| MWP2019-67  | 21.03.2019 | pig       | X |  | X |
| MWP2019-68  | 21.03.2019 | pig       | X |  | X |
| MWP2019-69  | 21.03.2019 | wild boar | X |  | X |
| MWP2019-70  | 25.03.2019 | pig       | X |  | X |
| MWP2019-71  | 25.03.2019 | pig       | X |  | X |
| MWP2019-72  | 25.03.2019 | pig       | X |  | X |
| MWP2019-73  | 25.03.2019 | pig       | X |  | X |
| MWP2019-74  | 26.03.2019 | pig       | X |  | X |
| MWP2019-75  | 26.03.2019 | pig       | X |  | X |
| MWP2019-77  | 02.04.2019 | wild boar | X |  | X |
| MWP2019-78  | 02.04.2019 | pig       | X |  | X |
| MWP2019-79  | 04.04.2019 | wild boar | X |  | X |
| MWP2019-80  | 04.04.2019 | pig       | X |  | X |
| MWP2019-81  | 04.04.2019 | wild boar | X |  | X |
| MWP2019-82  | 02.04.2019 | pig       | X |  | X |
| MWP2019-83  | 02.04.2019 | pig       | X |  | X |
| MWP2019-84  | 09.04.2019 | pig       | X |  | X |
| MWP2019-85  | 09.04.2019 | pig       | X |  | X |
| MWP2019-86  | 10.04.2019 | pig       | X |  | X |
| MWP2019-87  | 10.04.2019 | pig       | X |  | X |
| MWP2019-88  | 10.04.2019 | pig       | X |  | X |
| MWP2019-89  | 11.04.2019 | pig       | X |  | X |
| MWP2019-90  | 11.04.2019 | pig       | X |  | X |
| MWP2019-92  | 11.04.2019 | pig       | X |  | X |
| MWP2019-93  | 12.04.2019 | pig       | X |  | X |
| MWP2019-94  | 12.04.2019 | pig       | X |  | X |
| MWP2019-95  | 16.04.2019 | pig       | X |  | X |
| MWP2019-96  | 16.04.2019 | pig       | X |  | X |
| MWP2019-97  | 16.04.2019 | pig       | X |  | X |
| MWP2019-98  | 16.04.2019 | pig       | X |  | X |
| MWP2019-99  | 16.04.2019 | pig       | X |  | X |
| MWP2019-100 | 16.04.2019 | pig       | X |  | X |
| MWP2019-101 | 16.04.2019 | pig       | X |  | X |
| MWP2019-102 | 16.04.2019 | pig       | X |  | X |
| MWP2019-103 | 16.04.2019 | pig       | X |  | X |
| MWP2019-104 | 16.04.2019 | pig       | X |  | X |
| MWP2019-105 | 17.04.2019 | pig       | X |  | X |

|             |            |           |   |  |   |
|-------------|------------|-----------|---|--|---|
| MWP2019-106 | 17.04.2019 | pig       | X |  | X |
| MWP2019-107 | 24.04.2019 | pig       | X |  | X |
| MWP2019-108 | 24.04.2019 | pig       | X |  | X |
| MWP2019-109 | 24.04.2019 | pig       | X |  | X |
| MWP2019-110 | 25.04.2019 | pig       | X |  | X |
| MWP2019-111 | 25.04.2019 | pig       | X |  | X |
| MWP2019-112 | 29.04.2019 | pig       | X |  | X |
| MWP2019-113 | 29.04.2019 | pig       | X |  | X |
| MWP2019-114 | 29.04.2019 | pig       | X |  | X |
| MWP2019-115 | 29.04.2019 | pig       | X |  | X |
| MWP2019-116 | 29.04.2019 | pig       | X |  | X |
| MWP2019-117 | 30.04.2019 | wild boar | X |  | X |
| MWP2019-118 | 30.04.2019 | pig       | X |  | X |
| MWP2019-119 | 30.04.2019 | pig       | X |  | X |
| MWP2019-120 | 30.04.2019 | pig       | X |  | X |
| MWP2019-121 | 30.04.2019 | pig       | X |  | X |
| MWP2019-122 | 06.05.2019 | wild boar | X |  | X |
| MWP2019-123 | 09.05.2019 | pig       | X |  | X |
| MWP2019-124 | 17.05.2019 | pig       | X |  | X |
| MWP2019-125 | 17.05.2019 | pig       | X |  | X |
| MWP2019-126 | 17.05.2019 | pig       | X |  | X |
| MWP2019-127 | 22.05.2019 | pig       | X |  | X |
| MWP2019-128 | 22.05.2019 | pig       | X |  | X |
| MWP2019-129 | 22.05.2019 | pig       | X |  | X |
| MWP2019-130 | 22.05.2019 | pig       | X |  | X |
| MWP2019-131 | 23.05.2019 | pig       | X |  | X |
| MWP2019-132 | 24.05.2019 | wild boar | X |  | X |
| MWP2019-133 | 24.05.2019 | wild boar | X |  | X |
| MWP2019-134 | 28.05.2019 | pig       | X |  | X |
| MWP2019-135 | 28.05.2019 | pig       | X |  | X |
| MWP2019-136 | 28.05.2019 | pig       | X |  | X |
| MWP2019-137 | 28.05.2019 | pig       | X |  | X |
| MWP2019-138 | 28.05.2019 | pig       | X |  | X |
| MWP2019-139 | 28.05.2019 | pig       | X |  | X |
| MWP2019-140 | 28.05.2019 | pig       | X |  | X |
| MWP2019-141 | 28.05.2019 | pig       | X |  | X |
| MWP2019-142 | 29.05.2019 | pig       | X |  | X |
| MWP2019-143 | 29.05.2019 | pig       | X |  | X |
| MWP2019-144 | 29.05.2019 | pig       | X |  | X |
| MWP2019-145 | 03.06.2019 | pig       | X |  | X |
| MWP2019-146 | 04.06.2019 | pig       | X |  | X |
| MWP2019-147 | 04.06.2019 | pig       | X |  | X |
| MWP2019-148 | 04.06.2019 | pig       | X |  | X |
| MWP2019-149 | 05.06.2019 | pig       | X |  | X |
| MWP2019-150 | 06.06.2019 | pig       | X |  | X |
| MWP2019-151 | 06.06.2019 | pig       | X |  | X |
| MWP2019-152 | 06.06.2019 | pig       | X |  | X |
| MWP2019-153 | 06.06.2019 | pig       | X |  | X |
| MWP2019-154 | 07.06.2019 | pig       | X |  | X |
| MWP2019-155 | 07.06.2019 | pig       | X |  | X |
| MWP2019-156 | 07.06.2019 | pig       | X |  | X |
| MWP2019-157 | 07.06.2019 | pig       | X |  | X |

|             |            |           |   |  |   |
|-------------|------------|-----------|---|--|---|
| MWP2019-158 | 11.06.2019 | pig       | X |  | X |
| MWP2019-159 | 13.06.2019 | pig       | X |  | X |
| MWP2019-160 | 13.06.2019 | pig       | X |  | X |
| MWP2019-161 | 14.06.2019 | pig       | X |  | X |
| MWP2019-162 | 14.06.2019 | wild boar | X |  | X |
| MWP2019-163 | 18.06.2019 | pig       | X |  | X |
| MWP2019-164 | 18.06.2019 | pig       | X |  | X |
| MWP2019-165 | 18.06.2019 | pig       | X |  | X |
| MWP2019-166 | 18.06.2019 | pig       | X |  | X |
| MWP2019-167 | 18.06.2019 | pig       | X |  | X |
| MWP2019-168 | 19.06.2019 | pig       | X |  | X |
| MWP2019-169 | 24.06.2019 | pig       | X |  | X |
| MWP2019-170 | 24.06.2019 | pig       | X |  | X |
| MWP2019-171 | 25.06.2019 | wild boar | X |  | X |
| MWP2019-172 | 26.06.2019 | pig       | X |  | X |
| MWP2019-173 | 26.06.2019 | pig       | X |  | X |
| MWP2019-174 | 26.06.2019 | pig       | X |  | X |
| MWP2019-175 | 28.06.2019 | pig       | X |  | X |
| MWP2019-176 | 28.06.2019 | pig       | X |  | X |
| MWP2019-177 | 28.06.2019 | pig       | X |  | X |
| MWP2019-178 | 01.07.2019 | wild boar | X |  | X |
| MWP2019-179 | 03.07.2019 | pig       | X |  | X |
| MWP2019-180 | 03.07.2019 | pig       | X |  | X |
| MWP2019-181 | 03.07.2019 | pig       | X |  | X |
| MWP2019-182 | 03.07.2019 | pig       | X |  | X |
| MWP2019-183 | 05.07.2019 | wild boar | X |  | X |
| MWP2019-184 | 09.07.2019 | pig       | X |  | X |
| MWP2019-185 | 09.07.2019 | pig       | X |  | X |
| MWP2019-186 | 09.07.2019 | pig       | X |  | X |
| MWP2019-187 | 09.07.2019 | pig       | X |  | X |
| MWP2019-188 | 09.07.2019 | pig       | X |  | X |
| MWP2019-189 | 09.07.2019 | pig       | X |  | X |
| MWP2019-190 | 09.07.2019 | pig       | X |  | X |
| MWP2019-191 | 09.07.2019 | pig       | X |  | X |
| MWP2019-192 | 09.07.2019 | pig       | X |  | X |
| MWP2019-193 | 10.07.2019 | pig       | X |  | X |
| MWP2019-194 | 10.07.2019 | pig       | X |  | X |
| MWP2019-195 | 10.07.2019 | pig       | X |  | X |
| MWP2019-196 | 10.07.2019 | pig       | X |  | X |
| MWP2019-197 | 10.07.2019 | pig       | X |  | X |
| MWP2019-198 | 10.07.2019 | pig       | X |  | X |
| MWP2019-199 | 10.07.2019 | pig       | X |  | X |
| MWP2019-200 | 10.07.2019 | pig       | X |  | X |
| MWP2019-201 | 10.07.2019 | pig       | X |  | X |
| MWP2019-202 | 10.07.2019 | pig       | X |  | X |
| MWP2019-203 | 10.07.2019 | pig       | X |  | X |
| MWP2019-204 | 16.07.2019 | pig       | X |  | X |
| MWP2019-205 | 17.07.2019 | pig       | X |  | X |
| MWP2019-206 | 18.07.2019 | pig       | X |  | X |
| MWP2019-207 | 23.07.2019 | pig       | X |  | X |
| MWP2019-208 | 23.07.2019 | pig       | X |  | X |
| MWP2019-209 | 23.07.2019 | pig       | X |  | X |

|             |            |           |   |   |   |
|-------------|------------|-----------|---|---|---|
| MWP2019-210 | 23.07.2019 | pig       | X |   | X |
| MWP2019-211 | 24.07.2019 | pig       | X | X | X |
| MWP2019-212 | 24.07.2019 | pig       | X | X | X |
| MWP2019-213 | 24.07.2019 | pig       | X | X | X |
| MWP2019-214 | 24.07.2019 | pig       | X | X | X |
| MWP2019-215 | 25.07.2019 | pig       | X | X | X |
| MWP2019-216 | 25.07.2019 | pig       | X | X | X |
| MWP2019-217 | 30.07.2019 | pig       | X | X | X |
| MWP2019-218 | 11.07.2019 | pig       | X |   | X |
| MWP2019-219 | 01.08.2019 | pig       | X | X | X |
| MWP2019-220 | 01.08.2019 | wild boar | X | X | X |
| MWP2019-221 | 05.08.2019 | wild boar | X | X | X |
| MWP2019-222 | 07.08.2019 | pig       | X | X | X |
| MWP2019-223 | 07.08.2019 | pig       | X | X | X |
| MWP2019-224 | 07.08.2019 | pig       | X | X | X |
| MWP2019-225 | 12.08.2019 | wild boar | X | X | X |
| MWP2019-226 | 12.08.2019 | wild boar | X | X | X |
| MWP2019-227 | 12.08.2019 | wild boar | X | X | X |
| MWP2019-228 | 14.08.2019 | pig       | X | X | X |
| MWP2019-229 | 14.08.2019 | pig       | X | X | X |
| MWP2019-230 | 16.08.2019 | pig       | X | X | X |
| MWP2019-231 | 16.08.2019 | wild boar | X | X | X |
| MWP2019-232 | 19.08.2019 | pig       | X | X | X |
| MWP2019-233 | 19.08.2019 | pig       | X | X | X |
| MWP2019-234 | 19.08.2019 | pig       | X | X | X |
| MWP2019-235 | 20.08.2019 | wild boar | X | X | X |
| MWP2019-236 | 20.08.2019 | wild boar | X | X | X |
| MWP2019-237 | 22.08.2019 | pig       | X | X | X |
| MWP2019-238 | 22.08.2019 | wild boar | X | X | X |
| MWP2019-239 | 22.08.2019 | wild boar | X | X | X |
| MWP2019-240 | 22.08.2019 | wild boar | X | X | X |
| MWP2019-241 | 23.08.2019 | wild boar | X | X | X |
| MWP2019-242 | 29.08.2019 | pig       | X | X | X |
| MWP2019-243 | 29.08.2019 | wild boar | X | X | X |
| MWP2019-244 | 29.08.2019 | pig       | X | X | X |
| MWP2019-245 | 29.08.2019 | pig       | X | X | X |
| MWP2019-246 | 30.08.2019 | pig       | X | X | X |
| MWP2019-247 | 30.08.2019 | pig       | X | X | X |
| MWP2019-248 | 30.08.2019 | wild boar | X | X | X |
| MWP2019-249 | 03.09.2019 | wild boar | X | X | X |
| MWP2019-250 | 03.09.2019 | wild boar | X | X | X |
| MWP2019-251 | 03.09.2019 | wild boar | X | X | X |
| MWP2019-252 | 03.09.2019 | wild boar | X | X | X |
| MWP2019-253 | 03.09.2019 | pig       | X | X | X |
| MWP2019-254 | 04.09.2019 | pig       | X | X | X |
| MWP2019-255 | 05.09.2019 | pig       | X | X | X |
| MWP2019-256 | 05.09.2019 | pig       | X | X | X |
| MWP2019-257 | 05.09.2019 | pig       | X | X | X |
| MWP2019-258 | 05.09.2019 | wild boar | X | X | X |
| MWP2019-259 | 05.09.2019 | pig       | X | X | X |
| MWP2019-260 | 05.09.2019 | pig       | X | X | X |
| MWP2019-261 | 12.09.2019 | pig       | X | X | X |

|             |            |           |   |   |   |
|-------------|------------|-----------|---|---|---|
| MWP2019-262 | 05.09.2019 | wild boar | X | X | X |
| MWP2019-263 | 09.09.2019 | wild boar | X | X | X |
| MWP2019-264 | 09.09.2019 | wild boar | X | X | X |
| MWP2019-265 | 09.09.2019 | wild boar | X | X | X |
| MWP2019-266 | 11.09.2019 | wild boar | X | X | X |
| MWP2019-267 | 11.09.2019 | wild boar | X | X | X |
| MWP2019-268 | 13.09.2019 | wild boar | X | X | X |
| MWP2019-269 | 13.09.2019 | wild boar | X | X | X |
| MWP2019-270 | 13.09.2019 | pig       | X | X | X |
| MWP2019-271 | 13.09.2019 | pig       | X | X | X |
| MWP2019-272 | 17.09.2019 | pig       | X | X | X |
| MWP2019-273 | 17.09.2019 | pig       | X | X | X |
| MWP2019-274 | 17.09.2019 | pig       | X | X | X |
| MWP2019-275 | 20.09.2019 | pig       | X | X | X |
| MWP2019-276 | 20.09.2019 | pig       | X | X | X |
| MWP2019-277 | 20.09.2019 | pig       | X | X | X |
| MWP2019-278 | 23.09.2019 | wild boar | X |   | X |
| MWP2019-279 | 24.09.2019 | pig       | X | X | X |
| MWP2019-280 | 25.09.2019 | wild boar | X | X | X |
| MWP2019-281 | 25.09.2019 | pig       | X | X | X |
| MWP2019-282 | 25.09.2019 | pig       | X | X | X |
| MWP2019-283 | 25.09.2019 | pig       | X | X | X |
| MWP2019-284 | 27.09.2019 | pig       | X | X | X |
| MWP2019-285 | 27.09.2019 | pig       | X | X | X |
| MWP2019-286 | 27.09.2019 | pig       | X | X | X |
| MWP2019-287 | 30.09.2019 | wild boar | X | X | X |
| MWP2019-288 | 01.10.2019 | pig       | X | X | X |
| MWP2019-289 | 07.10.2019 | pig       | X | X | X |
| MWP2019-290 | 08.10.2019 | pig       | X | X | X |
| MWP2019-291 | 09.10.2019 | wild boar |   |   | X |
| MWP2019-292 | 09.10.2019 | wild boar | X | X | X |
| MWP2019-293 | 08.10.2019 | pig       | X | X | X |
| MWP2019-294 | 09.10.2019 | pig       | X | X | X |
| MWP2019-295 | 09.10.2019 | pig       | X | X | X |
| MWP2019-296 | 10.10.2019 | pig       | X |   | X |
| MWP2019-297 | 11.10.2019 | wild boar | X | X | X |
| MWP2019-298 | 11.10.2019 | pig       | X | X | X |
| MWP2019-299 | 15.10.2019 | pig       | X | X | X |
| MWP2019-300 | 15.10.2019 | pig       | X | X | X |
| MWP2019-301 | 16.10.2019 | pig       | X | X | X |
| MWP2019-302 | 16.10.2019 | pig       | X | X | X |
| MWP2019-303 | 16.10.2019 | pig       | X | X | X |
| MWP2019-304 | 16.10.2019 | pig       | X | X | X |
| MWP2019-305 | 17.10.2019 | wild boar | X | X | X |
| MWP2019-306 | 21.10.2019 | pig       | X | X | X |
| MWP2019-307 | 21.10.2019 | pig       | X | X | X |
| MWP2019-308 | 21.10.2019 | pig       | X | X | X |
| MWP2019-309 | 22.10.2019 | pig       | X | X | X |
| MWP2019-310 | 22.10.2019 | pig       | X | X | X |
| MWP2019-311 | 22.10.2019 | pig       | X | X | X |
| MWP2019-312 | 22.10.2019 | wild boar |   | X |   |
| MWP2019-313 | 24.10.2019 | pig       | X | X | X |

|             |            |           |   |   |   |
|-------------|------------|-----------|---|---|---|
| MWP2019-314 | 24.10.2019 | pig       | X | X | X |
| MWP2019-315 | 24.10.2019 | pig       | X | X | X |
| MWP2019-316 | 24.10.2019 | pig       | X | X | X |
| MWP2019-317 | 24.10.2019 | pig       | X | X | X |
| MWP2019-318 | 25.10.2019 | pig       | X | X | X |
| MWP2019-319 | 25.10.2019 | pig       | X | X | X |
| MWP2019-320 | 25.10.2019 | pig       | X | X | X |
| MWP2019-321 | 28.10.2019 | wild boar | X | X | X |
| MWP2019-322 | 28.10.2019 | wild boar | X | X | X |
| MWP2019-323 | 29.10.2019 | pig       | X | X | X |
| MWP2019-324 | 30.10.2019 | pig       | X | X | X |
| MWP2019-325 | 30.10.2019 | wild boar | X | X | X |
| MWP2019-326 | 30.10.2019 | pig       | X | X | X |
| MWP2019-327 | 30.10.2019 | pig       | X | X | X |
| MWP2019-328 | 30.10.2019 | pig       | X | X | X |
| MWP2019-329 | 04.11.2019 | pig       | X | X | X |
| MWP2019-330 | 04.11.2019 | pig       | X | X | X |
| MWP2019-331 | 04.11.2019 | pig       | X | X | X |
| MWP2019-332 | 04.11.2019 | pig       | X | X | X |
| MWP2019-333 | 04.11.2019 | pig       | X | X | X |
| MWP2019-334 | 04.11.2019 | pig       | X | X | X |
| MWP2019-335 | 04.11.2019 | pig       | X | X | X |
| MWP2019-336 | 04.11.2019 | pig       | X | X | X |
| MWP2019-337 | 04.11.2019 | pig       | X | X | X |
| MWP2019-338 | 04.11.2019 | pig       | X | X | X |
| MWP2019-339 | 05.11.2019 | wild boar | X | X | X |
| MWP2019-340 | 05.11.2019 | wild boar | X | X | X |
| MWP2019-341 | 05.11.2019 | wild boar | X | X | X |
| MWP2019-342 | 05.11.2019 | wild boar | X | X | X |
| MWP2019-343 | 05.11.2019 | wild boar | X | X | X |
| MWP2019-344 | 06.11.2019 | wild boar | X | X | X |
| MWP2019-345 | 11.11.2019 | wild boar | X |   | X |
| MWP2019-346 | 12.11.2019 | pig       | X | X | X |
| MWP2019-347 | 12.11.2019 | pig       | X | X | X |
| MWP2019-348 | 12.11.2019 | pig       | X | X | X |
| MWP2019-349 | 12.11.2019 | pig       | X | X | X |
| MWP2019-350 | 12.11.2019 | wild boar | X | X | X |
| MWP2019-351 | 15.11.2019 | pig       | X | X | X |
| MWP2019-352 | 15.11.2019 | pig       | X | X | X |
| MWP2019-353 | 18.11.2019 | pig       | X | X | X |
| MWP2019-354 | 18.11.2019 | pig       | X | X | X |
| MWP2019-355 | 18.11.2019 | pig       | X | X | X |
| MWP2019-356 | 18.11.2019 | pig       | X | X | X |
| MWP2019-357 | 18.11.2019 | pig       | X | X | X |
| MWP2019-358 | 18.11.2019 | pig       | X | X | X |
| MWP2019-359 | 18.11.2019 | pig       | X | X | X |
| MWP2019-360 | 21.11.2019 | pig       | X | X | X |
| MWP2019-361 | 26.11.2019 | wild boar | X | X | X |
| MWP2019-362 | 27.11.2019 | pig       | X | X | X |
| MWP2019-363 | 27.11.2019 | wild boar | X | X | X |
| MWP2019-364 | 28.11.2019 | pig       | X | X | X |
| MWP2019-365 | 28.11.2019 | pig       | X | X | X |

|             |            |           |   |   |   |
|-------------|------------|-----------|---|---|---|
| MWP2019-366 | 19.11.2019 | pig       | X | X | X |
| MWP2019-367 | 19.11.2019 | wild boar | X | X | X |
| MWP2019-368 | 27.11.2019 | wild boar | X | X | X |
| MWP2019-369 | 28.11.2019 | pig       | X | X | X |
| MWP2019-370 | 29.11.2019 | pig       | X | X | X |
| MWP2019-371 | 02.12.2019 | pig       | X | X | X |
| MWP2019-372 | 02.12.2019 | pig       | X | X | X |
| MWP2019-373 | 02.12.2019 | pig       | X | X | X |
| MWP2019-374 | 03.12.2019 | wild boar | X | X | X |
| MWP2019-375 | 05.12.2019 | pig       | X | X | X |
| MWP2019-376 | 06.12.2019 | pig       | X | X | X |
| MWP2019-377 | 09.12.2019 | pig       | X | X | X |
| MWP2019-378 | 10.12.2019 | pig       | X | X | X |
| MWP2019-379 | 10.12.2019 | pig       | X | X | X |
| MWP2019-380 | 10.12.2019 | pig       | X | X | X |
| MWP2019-381 | 10.12.2019 | pig       | X | X | X |
| MWP2019-382 | 11.12.2019 | wild boar | X | X | X |
| MWP2019-383 | 13.12.2019 | wild boar | X | X | X |
| MWP2019-384 | 17.12.2019 | pig       | X | X | X |
| MWP2019-385 | 17.12.2019 | wild boar | X | X | X |
| MWP2019-386 | 17.12.2019 | wild boar | X | X | X |
| MWP2019-387 | 18.12.2019 | pig       | X | X | X |
| MWP2019-388 | 18.12.2019 | pig       | X | X | X |
| MWP2019-389 | 18.12.2019 | pig       | X | X | X |
| MWP2019-390 | 18.12.2019 | pig       | X | X | X |
| MWP2019-391 | 19.12.2019 | pig       | X | X | X |
| MWP2019-392 | 19.12.2019 | pig       | X | X | X |
| MWP2019-393 | 23.12.2019 | wild boar | X | X | X |
| MWP2019-394 | 23.12.2019 | pig       | X | X | X |
| MWP2019-395 | 30.12.2019 | wild boar | X | X | X |



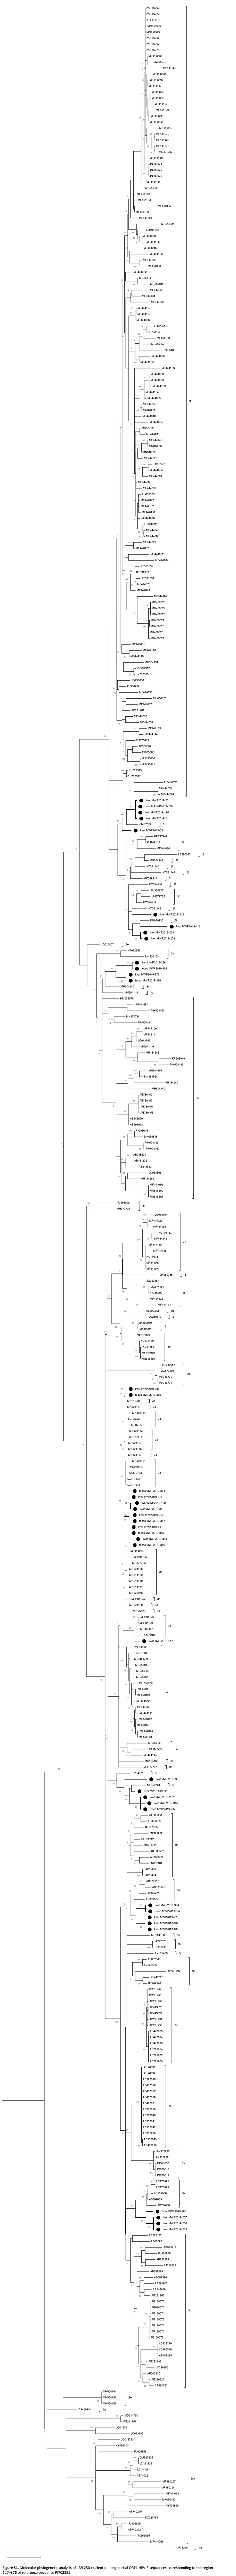

**Figure S1.** Molecular phylogenetic analysis of 139 250-nucleotide-long partial ORF1 HEV-3 sequences corresponding to the region 127–376 of reference sequence FJ705359.
